# Supplementary material for: Virulence Characteristics and Molecular Epidemiology of Pyogenic Liver Abscess Causing Multidrug Resistant Klebsiella pneumoniae in Wenzhou, China
Source: Research Square preprint supplement (doi:10.21203/rs.3.rs-42660/v3), 2021-01-21
Supplement: Supplementary file 1 [file 76a8540f4a53c3972b9efebd.docx]

**Table S1** Comparison of clinical characteristics between MDR strains and non-MDR strains from KP-PLA

| Characteristic | MDR strains (n = 12) | non-MDR strains (n = 151) | *P* Value |
| --- | --- | --- | --- |
| Age, years | 59.5 (40.8-67.0) | 63.5 (53.0-70.8) | 0.101 |
| Gender |  |  | 1.000 |
| Male | 7 (58.3) | 93 (61.6) |  |
| Female | 5 (41.7) | 58 (38.4) |  |
| Underlying or concomitant conditions |  |  |  |
| Diabetes mellitus | 5 (41.7) | 76 (50.3) | 0.563 |
| Biliary disease | 6 (50.0) | 17 (11.3) | 0.000* |
| Hepatitis and cirrhosis | 3 (25.0) | 5 (3.3) | 0.014* |
| History of intra-abdominal trauma or surgery | 7 (58.3) | 39 (25.8) | 0.038* |
| Hypertension | 1 (8.3) | 40 (26.5) | 0.294 |
| Malignancy | 1 (8.3) | 6 (4.0) | 0.421 |
| Admission temperature (°C) | 38.8 (38.3-39.4) | 38.9 (37.8-39.5) | 0.839 |
| Clinical Symptoms |  |  |  |
| Fever (>37.5°C) | 11 (91.7) | 126 (83.4) | 0.734 |
| Chill | 11 (91.7) | 121 (80.1) | 0.550 |
| Abdominal pain | 2 (16.7) | 63 (41.7) | 0.162 |
| Vomit | 1 (8.3) | 23 (15.2) | 0.821 |
| Frail | 1 (8.3) | 24 (15.9) | 0.777 |
| Abdominal distension | 1 (8.3) | 4 (2.6) | 0.321 |
| Invasive procedure | 11 (91.7) | 130 (86.1) | 0.916 |
| Use of hormones and/or immunosuppressants | 7 (58.3) | 45 (29.8) | 0.086 |
| Multiplicity of the abscess |  |  | 0.458 |
| Single | 7 (58.3) | 110 (72.8) |  |
| Multiple (≥2 abscesses) | 5 (41.7) | 41 (27.2) |  |
| Laboratory examination |  |  |  |
| WBC count, ×109/L | 10.9 (6.6-12.6) | 10.8 (8.0-13.6) | 0.403 |
| RBC count, ×1012/L | 3.7 (3.2-4.5) | 3.9 (3.6-4.2) | 0.462 |
| ALT(U/L) | 38.0 (18.3-42.3) | 42.0 (24.0-80.0) | 0.259 |
| AST(U/L) | 37.0 (25.0-44.3) | 37.0 (24.0-69.5) | 0.602 |
| Albumin, g/L | 30.3±5.1 | 29.3±5.1 | 0.521 |
| Method of abscess treatment |  |  |  |
| Simple antibacterial | 3 (25.0) | 27 (17.9) | 0.822 |
| Abscess drainage | 9 (75.0) | 120 (79.5) | 1.000 |
| Surgical removal | 0 (0.0) | 4 (2.6) | 1.000 |
| Abscess prognosis |  |  | 0.691 |
| Effective | 7 (58.3) | 109 (72.2) |  |
| Ineffective | 5 (41.7) | 42 (27.8) |  |
| Clinical outcomes |  |  |  |
| Length of hospital stay, days | 21.0（16.0-37.5） | 17.0(12.0-25.5) | 0.061 |
| Metastatic infections | 0 (0.0) | 4 (2.6) | 1.000 |
| ICU admission | 2 (16.7) | 14 (9.3) | 0.745 |
| Septic shock | 1 (8.3) | 14 (9.3) | 1.000 |
| Septicemia | 2 (16.7) | 18 (11.9) | 0.980 |
| In-hospital deaths | 0 (0.0) | 1 (0.7) | 1.000 |

Values are presented as median (25th - 75th percentile), mean ± SD or No. (%) of patients

*WBC* white blood cell, *RBC* red blood cell, *ALT* alanine aminotransferase, *AST* aspartate aminotransferase **P* < 0.05
